# Supplementary material
Source: publisher figshare collection journal article supplement (https://gsajournals.figshare.com/ndownloader/files/25382969)
Supplement: Supplementary file 1 [file 25382969]

**Supplementary Figures**

**Supplementary Figure 1. Evolutionary history of TE super-families in** **the *R. distichophylla* and moso bamboo genomes.** A) The occupied TE lengths in *R. distichophylla* genome; B) the occupied TE lengths in the moso bamboo genome. The divergence was calculated between TEs and the consensus sequences generated by RepeatMasker.


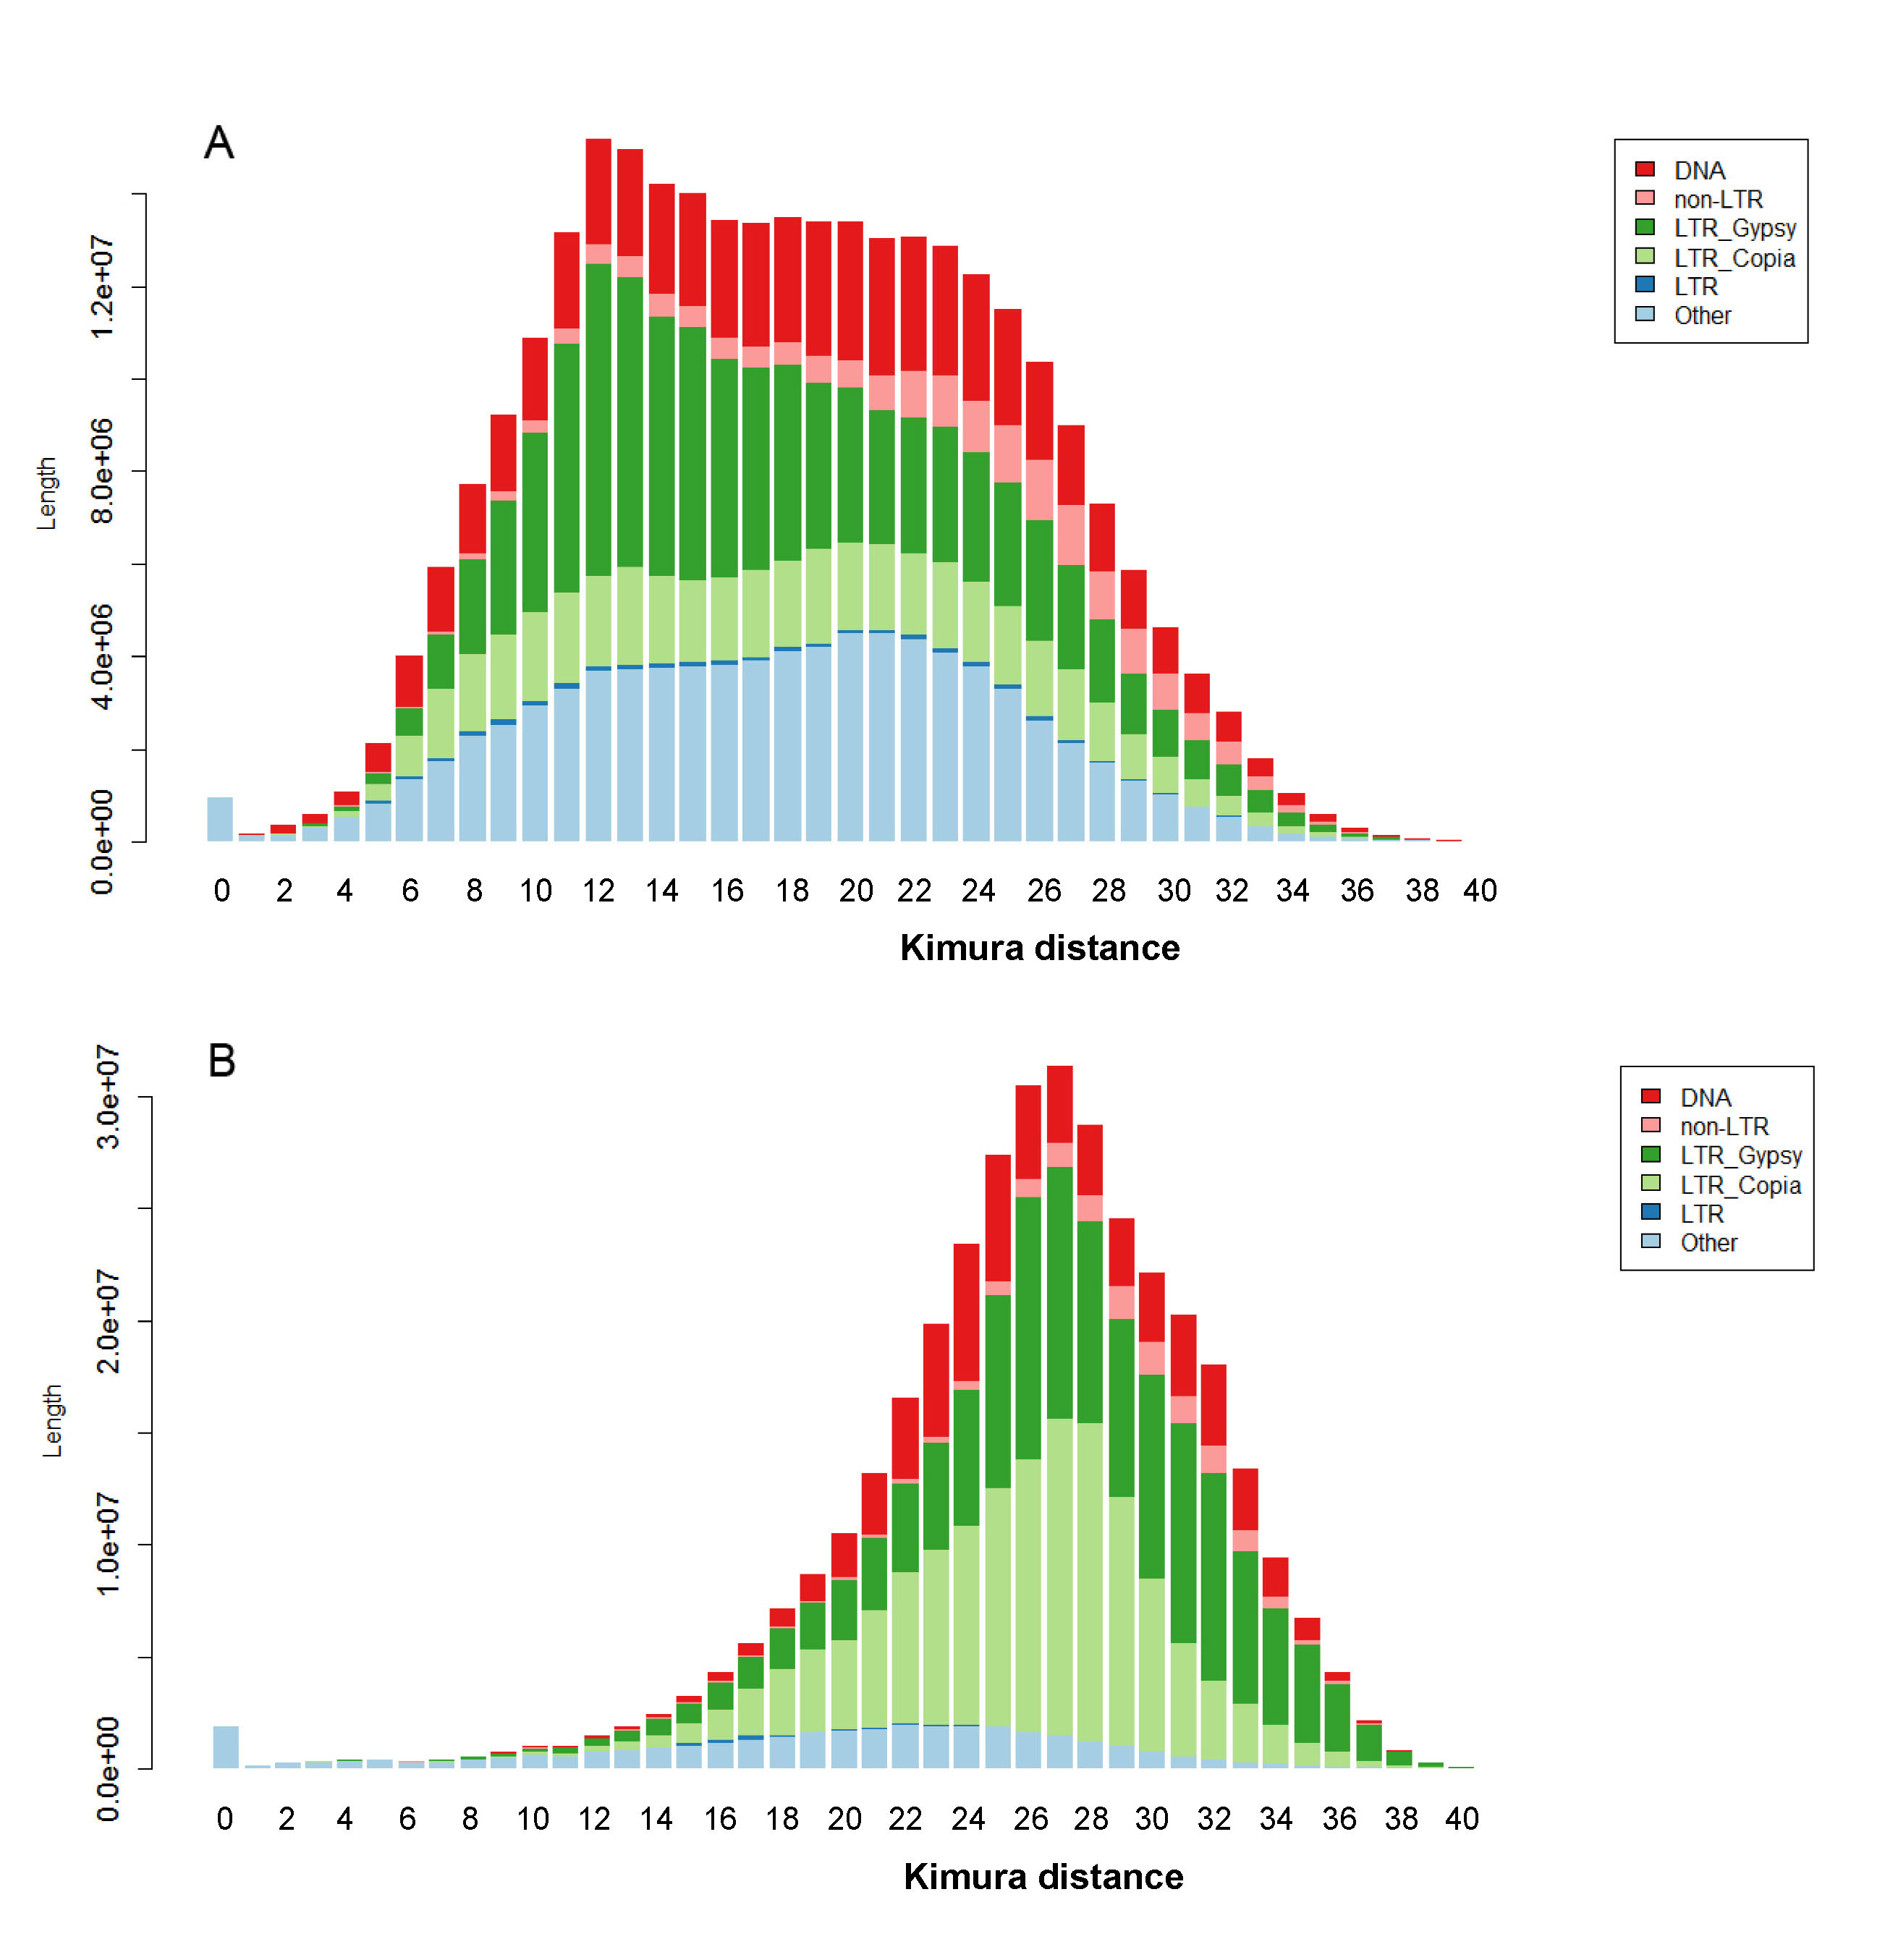


**Supplementary Figure 2. Comparisons of gene features among *R. distichophylla* and three other plant species**. Gene features include mRNA length, CDS length, exon length, intron length and exon number. No obvious length differences of gene features were observed among these three plant species (*Setaria italica*, *Brachypodium distachyon* and *Oryza sativa*).


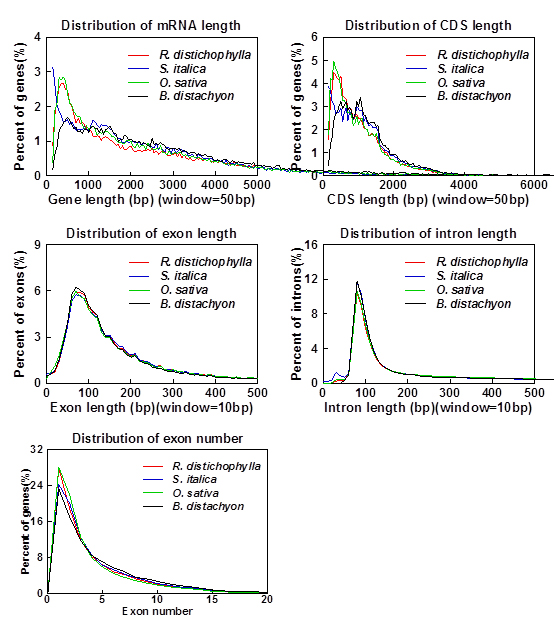


**Supplementary Tables**

**Supplementary Table 1. Whole genome sequencing (WGS) reads used to assemble the *R. distichophylla* genome.**

| **Data Type** | **Lane**  **Information** | **Insert**  **Size (bp)** | **Read**  **Length (bp)** | **Raw**  **Data (Gb)** | **Clean**  **Data (Gb)** | **Sequence Coverage**  **(×)*** |
| --- | --- | --- | --- | --- | --- | --- |
| **Total** | | |  | 253.94 | 165.91 | 272.89 |
| **Paired-ends** | | |  | 152.78 | 115.56 | 190.07 |
|  | P01 | 180 | 100 | 74.81 | 58.35 | 95.97 |
|  | P02 | 300 | 100 | 53.82 | 39.41 | 64.82 |
|  | P03 | 500 | 100 | 24.15 | 17.80 | 29.28 |
| **Mate pair** | | |  | 101.16 | 50.35 | 82.82 |
|  | M01 | 2000 | 100 | 8.54 | 7.92 | 13.03 |
|  | M02 | 2000 | 125 | 12.64 | 11.67 | 19.19 |
|  | M03 | 5000 | 100 | 15.03 | 11.92 | 19.61 |
|  | M04 | 5000 | 125 | 3.82 | 3.38 | 5.56 |
|  | M05 | 10000 | 90 | 31.56 | 8.06 | 13.26 |
|  | M06 | 20000 | 90 | 29.57 | 7.40 | 12.17 |

* The estimated genome size was ~608 Mb.

**Supplementary Table 2.** **Summary of RNA sequencing (RNA-Seq) of *R. distichophylla*.**

| **RNA**  **Source Tissues** | **Read Length**  **(bp)** | **Number of Pair-end Reads** | **Clean Data (bp)** |
| --- | --- | --- | --- |
| **Stem** | 100 | 26,533,101 | 5,306,620,200 |
| **Root** | 100 | 27,651,149 | 5,530,229,800 |
| **Female inflorescence** | 100 | 28,030,510 | 5,606,102,000 |
| **Leaf** | 100 | 27,717,564 | 5,543,512,800 |
| **Total** |  | 109,932,324 | 21,986,464,800 |

**Supplementary Table 3. Summary of genome assembly for *R. distichophylla*.**

| **Assembly Features** | | **Values** |
| --- | --- | --- |
| **Library Number** | | 9 |
| **Sequence Coverage (**×**)** | | 272.89 |
|  | **180 bp** | 95.97 |
|  | **300 bp** | 64.82 |
|  | **500 bp** | 29.28 |
|  | **2 Kb** | 32.22 |
|  | **5 Kb** | 25.17 |
|  | **10 Kb** | 13.26 |
|  | **20 Kb** | 12.17 |
| **Assembled Length (bp)** | | 580,854,656 |
|  | **Scaffold N50 (bp)** | 1,806,674 |
|  | **Scaffold N90 (bp)** | 3,687 |
|  | **Contig N50 (bp)** | 86,364 |
|  | **Contig N90 (bp)** | 3,477 |
|  | **Scaffold Number** | 38,269 |
|  | **Contig Number** | 45,206 |
|  | **Longest Scaffold (bp)** | 7,779,908 |
|  | **Longest Contig (bp)** | 650,854 |
| **>1Mb Scaffold Length (bp)** | | 397,604,329 |
|  | **0.1-1 Mb** | 70,036,361 |
|  | **10-100 Kb** | 24,602,676 |
|  | **1-10 Kb** | 88,536,026 |
|  | **1 bp-1 Kb** | 75,264 |
| **Estimated Length (Mb)** | | 608 |
| **No gap Length (bp)** | | 563,901,200 |
|  | **Gap Number** | 6,937 |
|  | **Gap Length (bp)** | 16,953,456 |
| **Coverage (%)** | | 95.56 |
| **GC Content (%)** | | 44.97 |

**Supplementary Table 4. Validation of the *R. distichophylla* genome assembly using reads mapping and transcript alignments.**

|  | **Total** | **Mapped** | **Rate (%)** |
| --- | --- | --- | --- |
| **Reads mapping** | | | |
| Short libraries | 211,270,340 | 188,569,033 | 89.25 |
| **Transcripts assembled in this study*** | | | |
| Unigenes | 131,575 | 102,676 | 78.04 |

* Hits with Coverage >= 30% and Identity >= 80%.

**Supplementary Table 5. Assessment of the *R. distichophylla* genome assembly using BUSCO.**

| **BUSCOs from Embryophyta lineage*** | | |
| --- | --- | --- |
| **Type** | **Number** | **Percent (%)** |
| Complete | 1,326 | 92.08 |
| Duplicated | 44 | 3.06 |
| Fragmented | 17 | 1.18 |
| Missing | 53 | 3.68 |

* The 1,440 BUSCO conserved genes used were collected from Embryophyta lineage;

## Supplementary Table 6. Statistics of repeat sequences in the *R. distichophylla* and moso bamboo genomes.

| **Type** | | ***R. distichophylla*** | | **Moso bamboo** | |
| --- | --- | --- | --- | --- | --- |
| **Length (Mb)** | **Percentage (%)** | **Length (Mb)** | **Percentage(%)** |
| **Total DNA TEs** | | **25.78** | **4.44** | **157.02** | **7.65** |
|  | CMC-EnSpm | 9.19 | 1.58 | 1.54 | 0.08 |
|  | hAT | 5.77 | 0.99 | 50.92 | 2.48 |
|  | MULE-MuDR | 6.86 | 1.18 | 28.14 | 1.37 |
|  | PIF-Harbinger | 1.66 | 0.29 | 59.68 | 2.91 |
|  | TcMar-Stowaway | 1.28 | 0.22 | 6.93 | 0.34 |
|  | Other | 0.64 | 0.11 | 1.86 | 0.09 |
|  | Helitron | 0.37 | 0.06 | 7.94 | 0.39 |
| **Total No-LTR RT** | | **8.73** | **1.50** | **21.97** | **1.07** |
|  | LINE | 7.10 | 1.22 | 21.59 | 1.05 |
|  | SINE | 1.63 | 0.28 | 0.38 | 0.02 |
| **Total LTR RTs** | | **209.02** | **35.99** | **1014.83** | **49.46** |
|  | *Copia* | 47.45 | 8.17 | 344.60 | 16.80 |
|  | *Gypsy* | 76.77 | 13.22 | 483.77 | 23.58 |
|  | Other | 84.80 | 14.60 | 186.46 | 9.09 |
| **Other Repeats** | | **41.57** | **7.16** | **101.85** | **4.96** |
|  | Satellite | 0.35 | 0.06 | 1.29 | 0.06 |
|  | Simple repeat | 6.04 | 1.04 | 10.50 | 0.51 |
|  | Low complexity | 1.12 | 0.19 | 2.03 | 0.10 |
|  | Unknown | 34.06 | 5.86 | 88.03 | 4.29 |
| **Total Repeat Elements** | | **285.10** | **49.08** | **1295.67** | **63.15** |

**Supplementary Table 7. Statistics of transposable element contents between the *R. distichophylla* and *R. guianensis* genome assemblies.**

| **TE Type** | ***R. distichophylla*** | | ***R. guianensis*** | |
| --- | --- | --- | --- | --- |
| **Length (Mb)** | **Percentage (%)** | **Length (Mb)** | **Percentage(%)** |
| LTR/*Copia* | 47.45 | 8.17 | 56.46 | 9.01 |
| LTR/*Gypsy* | 76.77 | 13.22 | 130.61 | 20.85 |
| LINE | 7.10 | 1.22 | 14.84 | 2.37 |
| SINE | 1.63 | 0.28 | 1.95 | 0.31 |
| DNA/CMC-EnSpm | 9.19 | 1.58 | 22.71 | 3.63 |
| DNA/MULE-MuDR | 6.86 | 1.18 | 14.92 | 2.38 |

## Supplementary Table 8. Summary of types and number of simple sequence repeats in the *R. distichophylla* and moso bamboo genomes.

| **Species** | **Repeat type** | **Number** | **Proportion**  **(%)** | **Total length (Kb)** | **Average length (bp)** |
| --- | --- | --- | --- | --- | --- |
| ***R. distichophylla*** | **Monomer** | 15,360 | 6.96 | 213.98 | 14 |
| **Dimer** | 35,195 | 15.94 | 706.01 | 20 |
| **Trimer** | 72,626 | 32.90 | 1063.37 | 15 |
| **Tetramer** | 58,046 | 26.30 | 791.80 | 14 |
| **Pentamer** | 26,823 | 12.15 | 442.42 | 16 |
| **Hexamer** | 12,687 | 5.75 | 250.85 | 20 |
| **Total** | **220,737** | **100** | **3468.42** | **16** |
| **Moso bamboo** | **Monomer** | 33,840 | 6.81 | 565.86 | 17 |
| **Dimer** | 112,350 | 22.61 | 2458.49 | 22 |
| **Trimer** | 129,860 | 26.14 | 1715.58 | 13 |
| **Tetramer** | 150,447 | 30.28 | 1963.37 | 13 |
| **Pentamer** | 45,721 | 9.20 | 726.52 | 16 |
| **Hexamer** | 24,601 | 4.95 | 505.93 | 21 |
| **Total** | **496,819** | **100** | **7935.75** | **16** |

**Supplementary Table 9. Non-coding RNA genes in the *R. distichophylla* genome.**

| **ncRNA Type** | **Loci#** | **Average length (bp)** | **Total length (bp)** | **% of genome** |
| --- | --- | --- | --- | --- |
| **miRNA** | 256 | 134.8 | 34496 | 0.0057 |
| **tRNA** | 727 | 74.3 | 53980 | 0.0089 |
| **rRNA (8S)** | 62 | 113.6 | 7043 | 0.0012 |
| **rRNA (18S)** | 12 | 1795.2 | 21542 | 0.0035 |
| **rRNA (28S)** | 16 | 4660.9 | 74574 | 0.0123 |
| **SnoRNA** | 242 | 108.3 | 26207 | 0.0043 |
| **snRNA** | 127 | 136.4 | 17314 | 0.0028 |

**Supplementary Table 10. Statistics of predicted protein-coding genes in the *R. distichophylla* genome＊.**

|  | Gene set | Number | Average gene length (bp) | Average CDS length (bp) | Average exon per gene | Average exon length (bp) | Average intron length (bp) |
| --- | --- | --- | --- | --- | --- | --- | --- |
| *De novo* | AUGUSTUS | 66,103 | 2310.59 | 995.44 | 4.36 | 228.38 | 391.56 |
| Fgenesh | 34,264 | 2748.16 | 1036.74 | 4.49 | 231.15 | 491.06 |
| Homolog | Moso bamboo heterocycla | 30,211 | 2617.29 | 981.46 | 3.82 | 256.82 | 579.76 |
| Stiff brome | 31,362 | 2633.39 | 1055.34 | 4.08 | 258.87 | 512.91 |
| Barley | 38,504 | 1884.43 | 838.36 | 3.21 | 261.09 | 473.11 |
| Maize | 32,212 | 2438.14 | 982.46 | 3.83 | 256.51 | 514.37 |
| *O. thomaeum* | 29,541 | 2691.81 | 916.39 | 3.85 | 238.30 | 623.93 |
| Foxtail millet | 33,129 | 2509.40 | 1019.58 | 3.94 | 258.84 | 506.90 |
| Rice | 32,298 | 2565.87 | 1016.27 | 3.93 | 258.89 | 529.68 |
| Sorghum | 31,291 | 2613.01 | 1043.01 | 4.01 | 259.87 | 520.99 |
| RNA-Seq | | 110,653 | 2385.95 | 782.61 | 2.69 | 290.77 | 947.85 |
| GLEAN | | 30,763 | 2886.93 | 1099.03 | 4.46 | 246.38 | 516.62 |
| Final set | | 30,763 | 2886.93 | 1099.03 | 4.46 | 246.38 | 516.62 |

＊ UTRs are not included in transcripts.

**Supplementary Table 11. Functional annotation of the *R. distichophylla* protein-coding genes.**

| **Type** |  | **Number** | **Percentage (%)** |
| --- | --- | --- | --- |
| **Total** |  | 30,763 | 100 |
| **Annotated** | **InterPro** | 25,506 | 82.91 |
|  | **GO a** | 15,226 | 49.49 |
|  | **KEGG a** | 18,580 | 60.39 |
|  | **Swiss-Prot b** | 20,272 | 65.89 |
|  | **TrEMBL** | 27,191 | 88.38 |
| **Un-annotated** |  | 3,429 | 11.15 |

a Directly retrieved from InterPro entry;

b Blast hits with e-value ≤ 1e-5 were retained.
